# Supplementary material
Source: bioRxiv or medRxiv preprint supplement (https://medrxiv.org/highwire/filestream/87019/field_highwire_adjunct_files/0/2020.06.22.20137141-1.pdf)
Supplement: Supplementary file [file 2020.06.22.20137141-1.pdf]

## Supplementary material

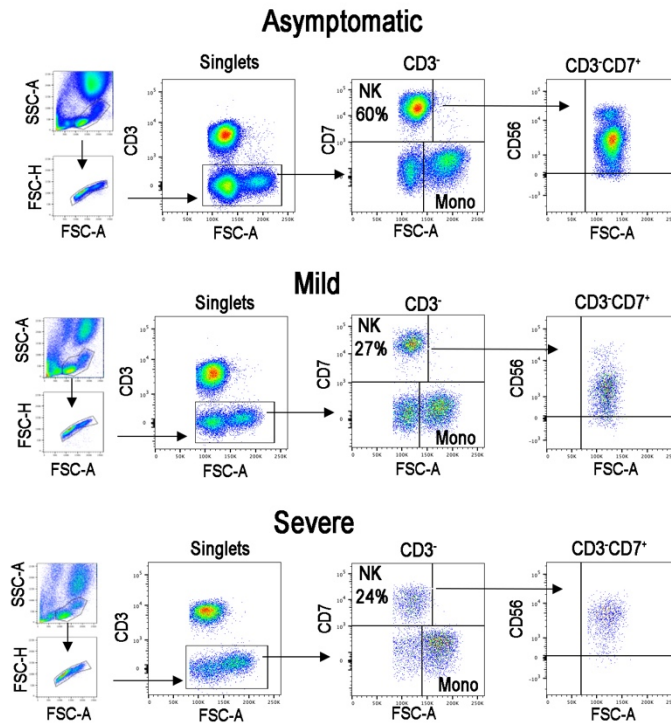

Figure S1

**Figure S1:** The lymphomonocyte gate was designed based on physical characteristics (FSC-A vs SSC-A). Singlets are identified by FSC-H vs FSC-A parameters. Gating strategy for the analysis of NK cells ( $CD3^-CD7^+FSC-A^{low}$ ) and monocytes ( $CD3^-CD7^-FSC-A^{high}$ ). NK cells identified as  $CD7^+$  in the  $CD3^-$  gate also express  $CD56^+$ .

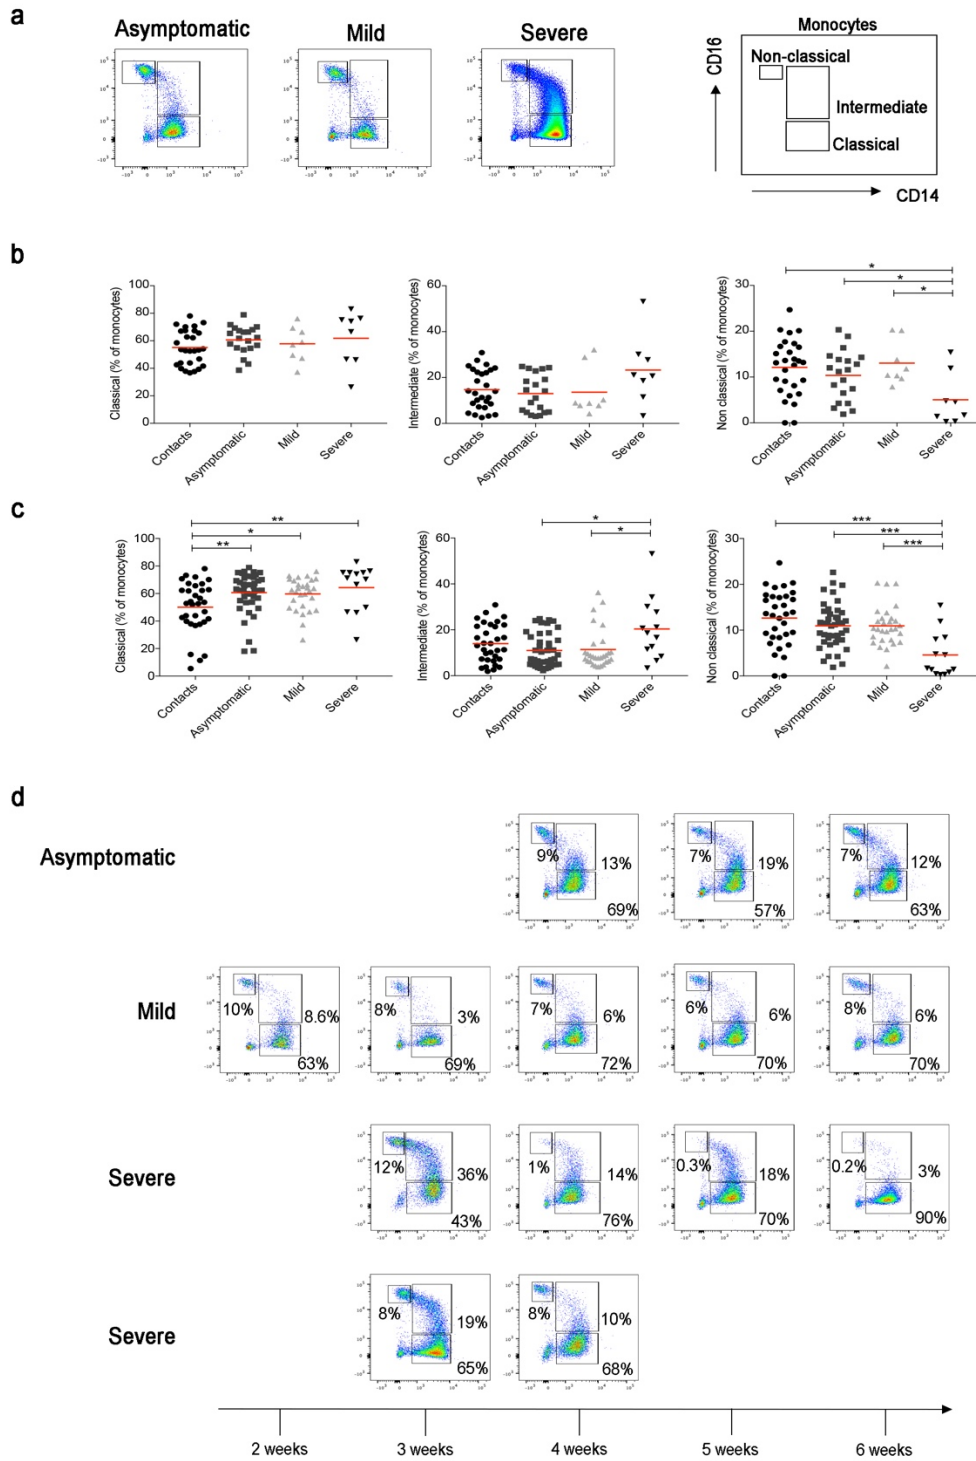

Figure S2

**Figure S2:** (a) Flow-cytometry analysis of monocytes in the blood of three representative patients with asymptomatic, mild and severe disease. Monocytes were gated as CD3-FSC-A<sup>high</sup>. Monocytes were divided as follow: classical (CD14<sup>++</sup>CD16<sup>-</sup>), intermediate (CD14<sup>+</sup>CD16<sup>+</sup>) and non-classical (CD14<sup>+</sup>CD16<sup>++</sup>). (b-c) Scatter plots indicate the percentage of classical, intermediate and non-classical monocytes in each group of patients reported as single value (b) or as collective data (c). Midlines indicate mean. Statistical significances were determined using unpaired, two-tailed Mann-Whitney *U*-tests. \**p*≤0.05, \*\**p*<0.01, \*\*\**p*<0.001. (d) FACS plots show the different distribution of monocytes populations in four representative patients (one asymptomatic, one mild and two severe) during the course of the disease (2-6 weeks).

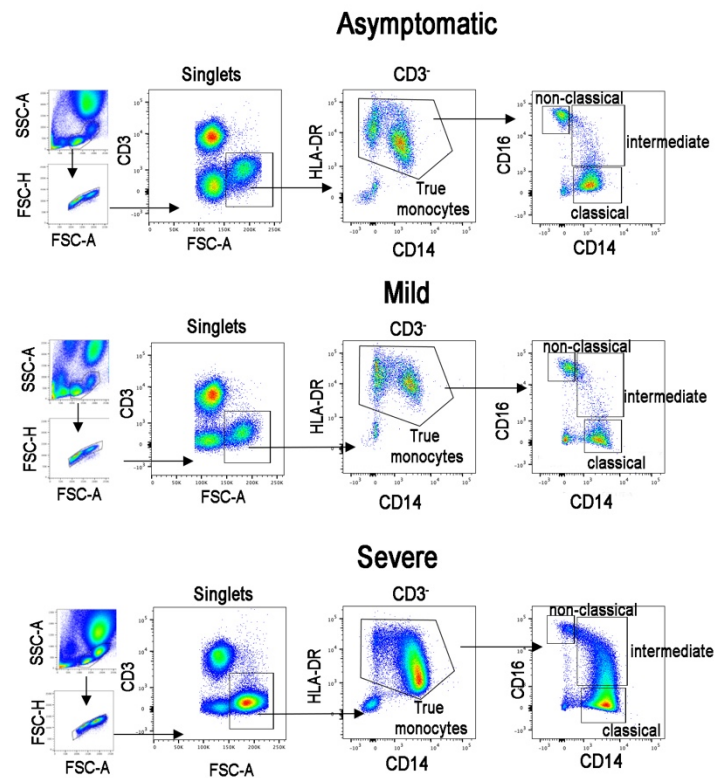

Figure S3

**Figure S3:** FACS plot show the gating strategy for the identification of monocytes (CD3<sup>+</sup>FSC-A<sup>high</sup>). True monocytes are double positive for HLA-DR and CD14. In the true monocytes gate, we identified the classical (CD14<sup>++</sup>CD16<sup>-</sup>), intermediate (CD14<sup>+</sup>CD16<sup>+</sup>) and non-classical (CD14<sup>+</sup>CD16<sup>-</sup>) populations.

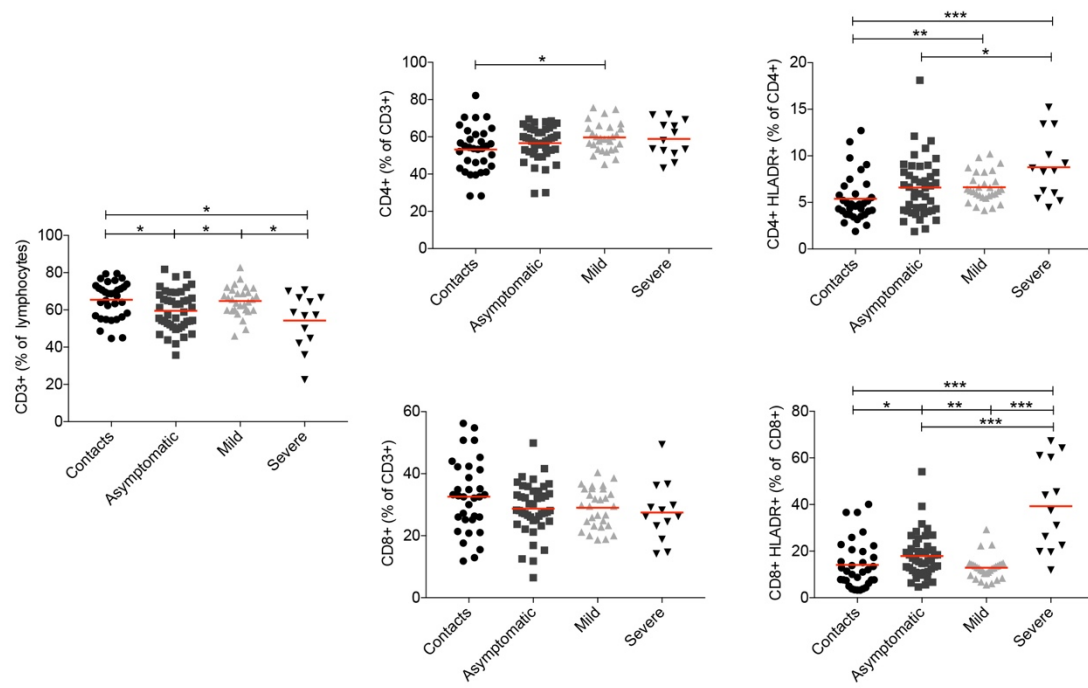

Figure S4

**Figure S4:** Scatter plots show percentage of T cells ( $CD3^+$ ),  $CD4^+$ ,  $CD4^+HLA-DR^+$ ,  $CD8^+$  and  $CD8^+HLA-DR^+$  T cells in all sample analyzed in the study. Midlines indicate mean. Statistical significances were determined using unpaired, two-tailed Mann-Whitney  $U$ -tests. \* $p < 0.05$ , \*\* $p < 0.01$ , \*\*\* $p < 0.001$ .

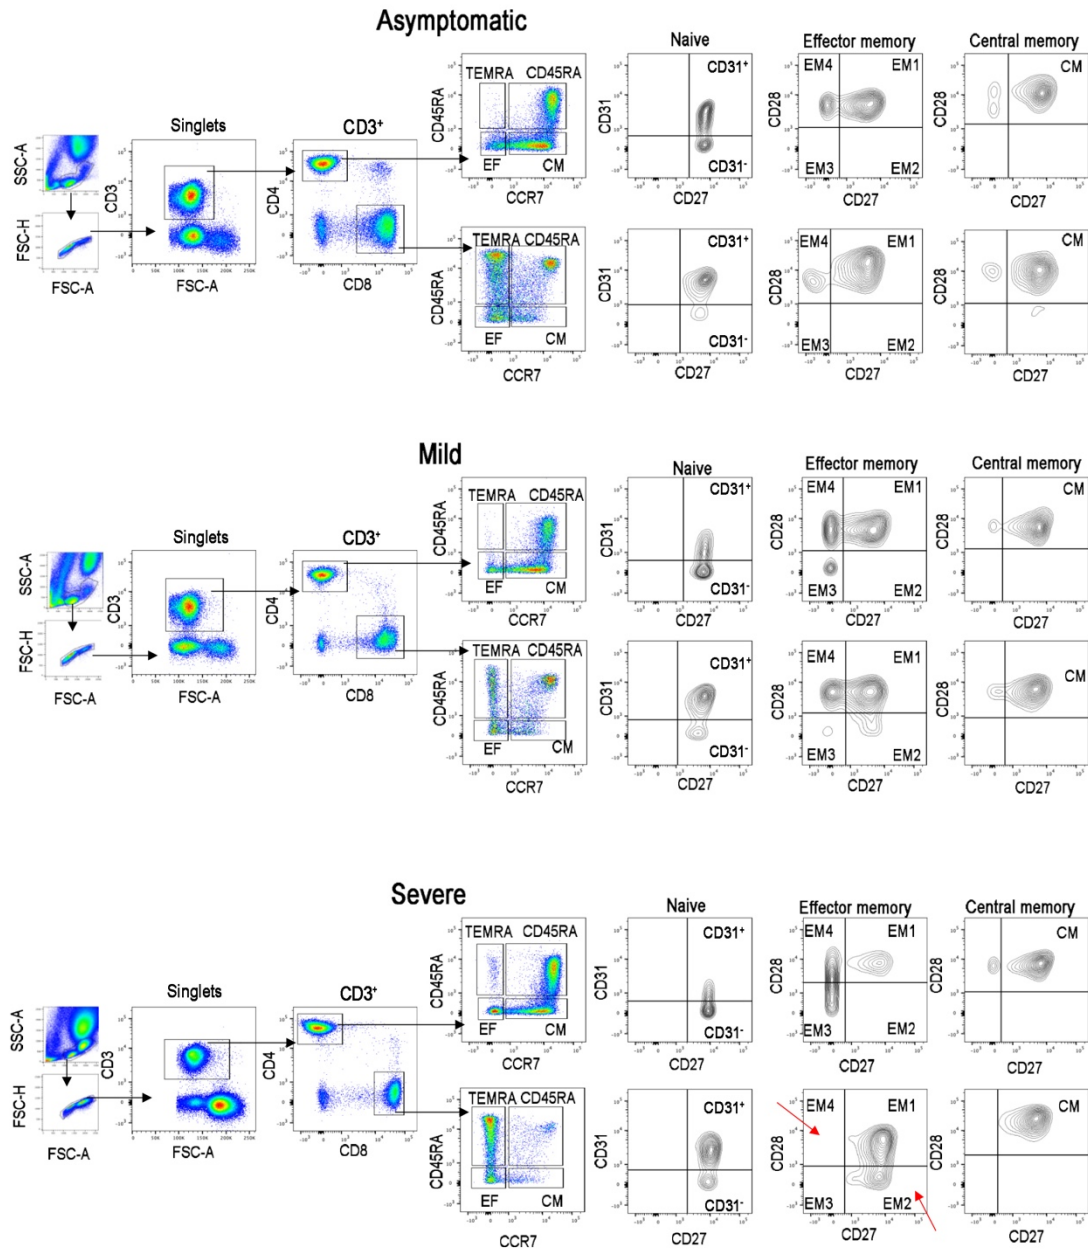

Figure S5

**Figure S5:** The CD8<sup>+</sup> and CD4<sup>+</sup>T cells were subdivided into the main T cell subsets using CD45RA and CCR7: naïve (CD45RA<sup>+</sup>CCR7<sup>+</sup>), central memory (CM CD45RA<sup>-</sup>CCR7<sup>+</sup>), effector memory (EM CD45RA<sup>-</sup>CCR7<sup>-</sup>) and TEMRA (CD45RA<sup>+</sup>CCR7<sup>-</sup>) T cells. Naïve T cells were further divided based on CD31 expression (CD31<sup>+</sup> and CD31<sup>-</sup>). CM and EM were separated based on the expression of CD27 and CD28.

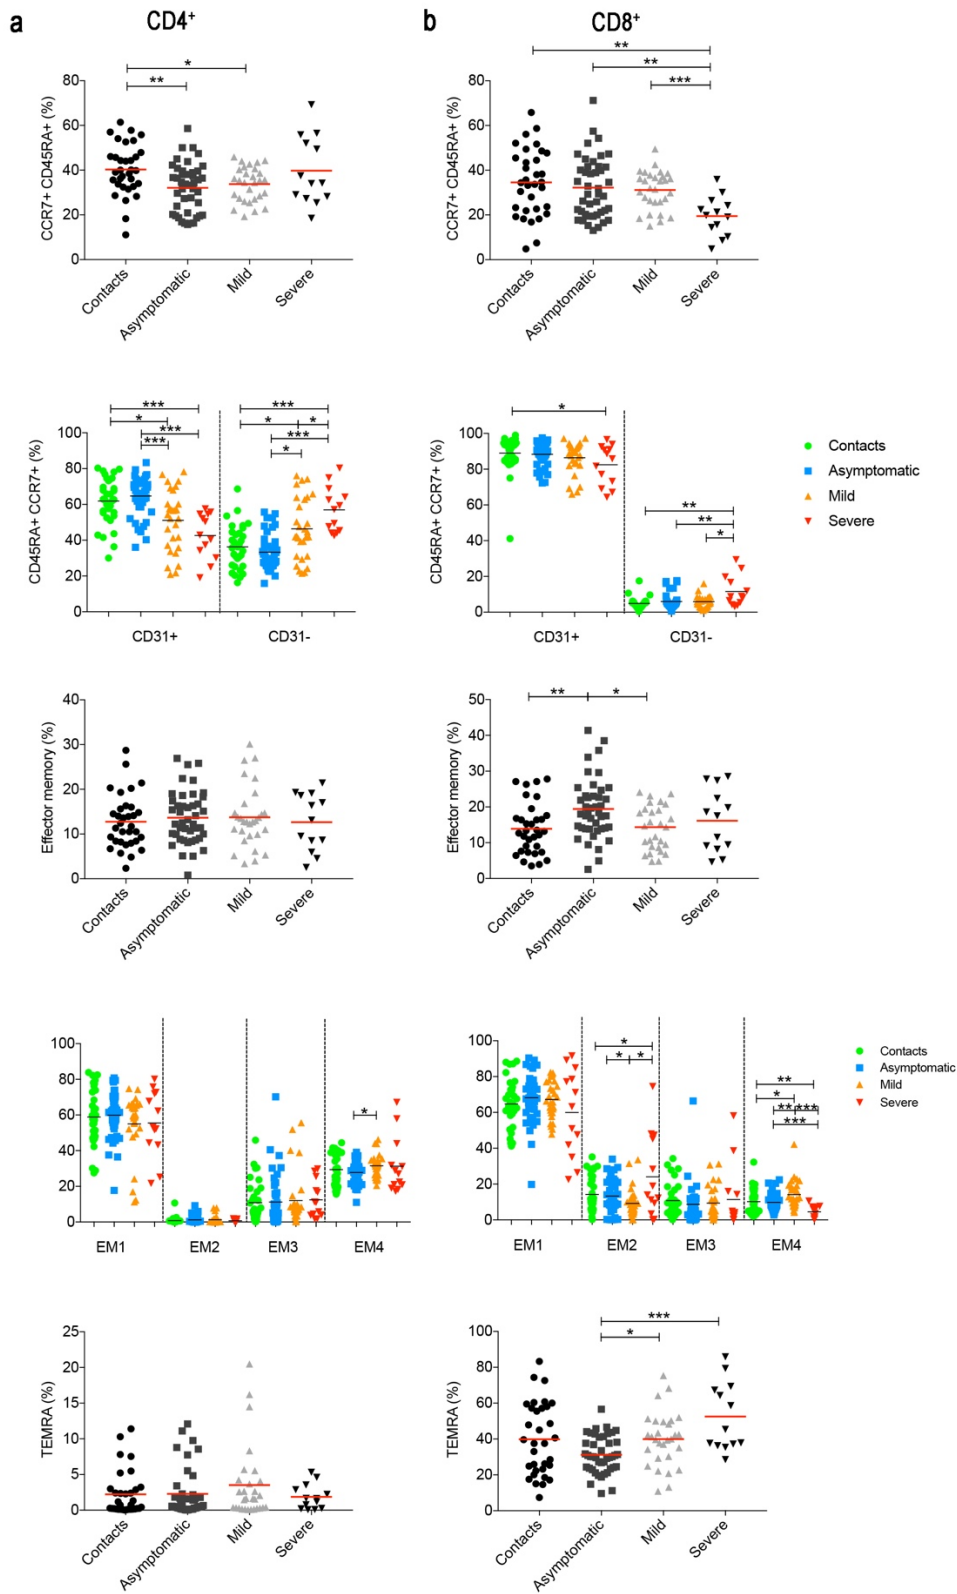

Figure S6

**Figure S6:** (a-b) We separately show the results obtained by the analysis of cumulative data from all samples of CD4<sup>+</sup> (Plots a) and CD8<sup>+</sup> T cells (Plots b). Graphs show the percentage of naive T cells (CD3<sup>+</sup>CCR7<sup>+</sup>CD45RA<sup>+</sup>) that either expressed or lack CD31 (CD31<sup>+</sup> and CD31<sup>-</sup>). Effector memory T cells (CD3<sup>+</sup>CCR7<sup>-</sup>CD45RA<sup>-</sup>) can be separated in EM1, EM2, EM3 and EM4. TEMRA T cells are CD3<sup>+</sup>CCR7<sup>-</sup>CD45RA<sup>+</sup>. Midlines indicate mean. Statistical significances were determined using unpaired, two-tailed Mann-Whitney *U*-tests. \**p*≤0.05, \*\**p*<0.01, \*\*\**p*<0.001.

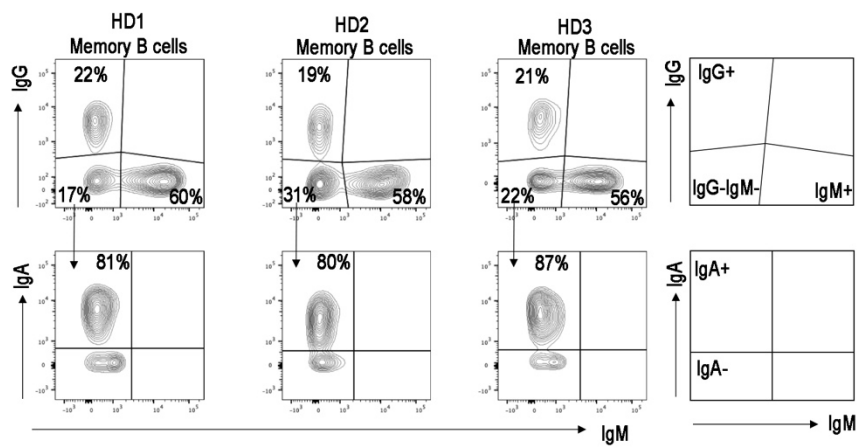

Figure S7

**Figure S7:** FACS plot in three healthy donors indicates that most of IgG<sup>+</sup>IgM<sup>-</sup> MBCs correspond to IgA expressing memory B and minimal part of these cells are IgA<sup>-</sup>IgG<sup>+</sup>IgM<sup>-</sup> MBCs.

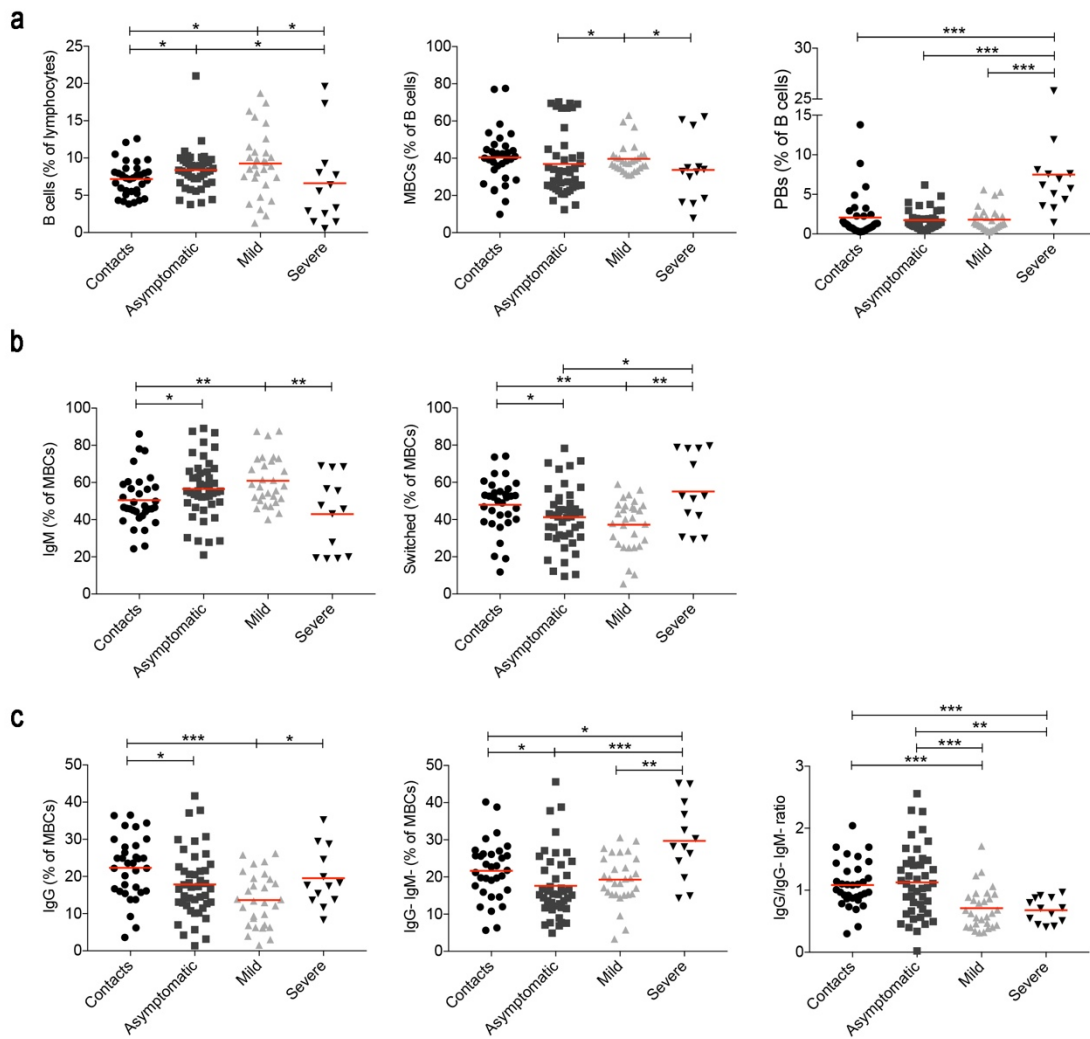

Figure S8

**Figure S8:**(a) Plots indicates the percentage of B cells, MBCs and plasmablasts. In b we show the frequencies of IgM and switched MBCs. In c we show the frequency of IgG<sup>+</sup>, IgG<sup>-</sup>IgM<sup>-</sup>MBCs. The ratio between IgG<sup>+</sup> and IgG<sup>-</sup>IgM<sup>-</sup> is also shown. Midlines indicate mean. Statistical significances were determined using unpaired, two-tailed Mann-Whitney *U*-tests. \* $p \leq 0.05$ , \*\* $p < 0.01$ , \*\*\* $p < 0.001$ .



**Supplementary Table 1: Characteristics of the study population**

| Study Group                   | COVID-19<br>severe       | COVID-19<br>mild          | SARS-Cov-2<br>asymptomatic | SARS-Cov-2<br>contacts     |
|-------------------------------|--------------------------|---------------------------|----------------------------|----------------------------|
| number of patients            | 8                        | 8                         | 20                         | 28                         |
| age, mean $\pm$ SD<br>(range) | 65 $\pm$ 20.1<br>(30-90) | 55.2 $\pm$ 7.2<br>(48-64) | 40.4 $\pm$ 10.9<br>(27-64) | 40.8 $\pm$ 10.9<br>(27-68) |
| sex (M/F)                     | 6/2                      | 5/3                       | 4/16                       | 8/20                       |

**Supplementary Table 2: Antibody panel**

|                | Antibodies                    | Source                        | Identifier   |
|----------------|-------------------------------|-------------------------------|--------------|
| T cell panel   | CD45RA (Clone HI100) FITC     | BD Biosciences                | 555488       |
|                | CCR7 (Clone CD197) PE         | BD Pharmingen                 | 566741       |
|                | CD3 (Clone SK7) PerCP         | BD Biosciences                | 345766       |
|                | CD4 (Clone RPA-T4) PE-Cy7     | Immunological Sciences        | MAB-19522PC7 |
|                | CD27 (Clone M-T271) APC       | BD Pharmingen                 | 558664       |
|                | CD8 (Clone SK1) APC-Cy7       | BD Biosciences                | 348793       |
|                | CD28 (Clone CD28.2) BV421     | BD Horizon                    | 562613       |
|                | CD31 (Clone WM59) BV605       | BD Horizon                    | 562855       |
| B cell panel   | CD45 (Clone 2D1) V500         | BD Biosciences<br>B-cell tube | 626220       |
|                | CD19 (Clone SJ25C1) PE-Cy7    |                               |              |
|                | CD24 (Clone ML5) PE           |                               |              |
|                | CD27 (Clone L128) APC         |                               |              |
|                | CD38 (Clone HIT2) PercP-Cy5.5 |                               |              |
|                | IgM (Clone G20-127) FITC      |                               |              |
|                | IgG (Clone G18-145) APC-H7    |                               |              |
|                | IgD (Clone IA6-2) V450        |                               |              |
|                | CD21 (Clone B-ly4 ) BV605     | BD OptiBuild                  | 740395       |
| Monocyte panel | CD45 (Clone 2D1) V500         | BD Biosciences                | 655873       |
|                | CD3 (Clone UCHT1) BV605       | BD OptiBuild                  | 742623       |
|                | CD14 (Clone M5E2) PE          | BD Pharmingen                 | 555398       |
|                | CD16 (Clone LNK16) FITC       | Immunological Sciences        | MAB-1810F    |
|                | CD4 (Clone RPA-T4) PE-Cy7     | Immunological Sciences        | MAB-19522PC7 |
|                | CD8 (Clone SK1) APC-H7        | BD Biosciences                | 641400       |
|                | CD38 (Clone HIT2) PerCP       | Immunological Sciences        | MAB-938PCP   |
|                | HLA-DR (Clone L243) V450      | BD Biosciences                | 655874       |
|                | CD33 (Clone P67.6) APC        | BD Biosciences                | 345800       |
| NK cell panel  | CD45 (Clone 2D1) V500         | BD Biosciences                | 655873       |
|                | CD3 (Clone SK7) PerCP         | BD Biosciences                | 345766       |
|                | CD4 (Clone RPA-T4) PE-Cy7     | Immunological Sciences        | MAB-19522PC7 |

**Supplementary Table 3: Monocytes mean values**

| Patients group                  | Contacts        | Asymptomatic    | Mild            | Severe          |
|---------------------------------|-----------------|-----------------|-----------------|-----------------|
|                                 | mean $\pm$ SD   | mean $\pm$ SD   | mean $\pm$ SD   | mean $\pm$ SD   |
| Monocytes<br>(% of lymphocytes) | 13.1 $\pm$ 6.1  | 13.3 $\pm$ 5.8  | 17.5 $\pm$ 6.2  | 37.1 $\pm$ 19.2 |
| Classical<br>(% monocytes)      | 55.1 $\pm$ 12.8 | 60.6 $\pm$ 10.2 | 57.8 $\pm$ 12.8 | 61.8 $\pm$ 19.8 |
| Intermediate<br>(% monocytes)   | 14.8 $\pm$ 8.5  | 13 $\pm$ 8.2    | 13.6 $\pm$ 10.6 | 23.3 $\pm$ 14.8 |
| Non Classical<br>(% monocytes)  | 12.1 $\pm$ 6.2  | 10.4 $\pm$ 5.4  | 13.1 $\pm$ 4.8  | 5 $\pm$ 5.7     |

**Supplementary Table 4: Monocytes total mean values**

| Patients group                  | Contacts        | Asymptomatic   | Mild            | Severe          |
|---------------------------------|-----------------|----------------|-----------------|-----------------|
|                                 | mean $\pm$ SD   | mean $\pm$ SD  | mean $\pm$ SD   | mean $\pm$ SD   |
| Monocytes<br>(% of lymphocytes) | 12.8 $\pm$ 6.1  | 14.6 $\pm$ 6.6 | 14.4 $\pm$ 5.3  | 29.2 $\pm$ 18   |
| Classical<br>(% monocytes)      | 54.3 $\pm$ 14.3 | 63.4 $\pm$ 9.5 | 59.7 $\pm$ 11.8 | 64.3 $\pm$ 16.6 |
| Intermediate<br>(% monocytes)   | 14 $\pm$ 8.2    | 11 $\pm$ 7.2   | 11.5 $\pm$ 8.7  | 20.4 $\pm$ 13.5 |
| Non Classical<br>(% monocytes)  | 11.7 $\pm$ 6.3  | 10.7 $\pm$ 5   | 10.9 $\pm$ 4.2  | 4.6 $\pm$ 4.9   |

**Supplementary Table 5: NK cells mean values**

| Patients group                 | Contacts        | Asymptomatic    | Mild           | Severe          |
|--------------------------------|-----------------|-----------------|----------------|-----------------|
|                                | mean $\pm$ SD   | mean $\pm$ SD   | mean $\pm$ SD  | mean $\pm$ SD   |
| NK<br>(% of CD3-)              | 38.9 $\pm$ 14.2 | 38.8 $\pm$ 10.7 | 29 $\pm$ 9.3   | 14.6 $\pm$ 13.1 |
| Monocytes<br>(% of CD3-)       | 30.3 $\pm$ 9.9  | 28.5 $\pm$ 8.5  | 39.5 $\pm$ 8.5 | 62.3 $\pm$ 20.1 |
| Monocytes/NK<br>ratio          | 0.9 $\pm$ 0.6   | 0.8 $\pm$ 0.4   | 1.5 $\pm$ 0.6  | 10.6 $\pm$ 10.3 |
| Monocytes/Lymphocytes<br>ratio | 0.2 $\pm$ 0.09  | 0.2 $\pm$ 0.08  | 0.2 $\pm$ 0.1  | 0.8 $\pm$ 0.8   |

**Supplementary Table 6: NK cells total mean values**

| Patients group                 | Contacts        | Asymptomatic   | Mild            | Severe          |
|--------------------------------|-----------------|----------------|-----------------|-----------------|
|                                | mean $\pm$ SD   | mean $\pm$ SD  | mean $\pm$ SD   | mean $\pm$ SD   |
| NK<br>(% of CD3-)              | 38.3 $\pm$ 13.5 | 41 $\pm$ 10.5  | 29.3 $\pm$ 11.1 | 17.5 $\pm$ 12.7 |
| Monocytes<br>(% of CD3-)       | 30.7 $\pm$ 9.3  | 29.3 $\pm$ 8.2 | 34.7 $\pm$ 10.8 | 55.4 $\pm$ 18.6 |
| Monocytes/NK<br>ratio          | 1 $\pm$ 0.5     | 0.8 $\pm$ 0.4  | 1.4 $\pm$ 0.9   | 7.5 $\pm$ 8.9   |
| Monocytes/Lymphocytes<br>ratio | 0.1 $\pm$ 0.08  | 0.2 $\pm$ 0.09 | 0.2 $\pm$ 0.08  | 0.6 $\pm$ 0.6   |

Supplementary Table 7: T cells mean values

| Patients group                                        | Contacts        | Asymptomatic    | Mild            | Severe          |
|-------------------------------------------------------|-----------------|-----------------|-----------------|-----------------|
|                                                       | mean $\pm$ SD   | mean $\pm$ SD   | mean $\pm$ SD   | mean $\pm$ SD   |
| CD3+<br>(% of lymphocytes)                            | 70 $\pm$ 8.3    | 67.2 $\pm$ 8.1  | 69.2 $\pm$ 7.9  | 55.4 $\pm$ 16.1 |
| CD4+<br>(% of CD3+)                                   | 60 $\pm$ 11.7   | 62.3 $\pm$ 7.8  | 64.4 $\pm$ 8.8  | 66.4 $\pm$ 10.9 |
| CD4+ HLADR<br>(% of CD4+)                             | 5.3 $\pm$ 2.4   | 6.9 $\pm$ 3.9   | 7.1 $\pm$ 1.8   | 9.5 $\pm$ 3.4   |
| CD4+ central memory<br>(% of CD4+)                    | 42.7 $\pm$ 7.5  | 46.9 $\pm$ 8.9  | 50.3 $\pm$ 5.4  | 42.7 $\pm$ 12.3 |
| CD4+ effector memory<br>(% of CD4+)                   | 13.4 $\pm$ 6.2  | 14.2 $\pm$ 6.5  | 11.7 $\pm$ 4.1  | 13.3 $\pm$ 6.1  |
| CD4+ effector memory 1<br>(% of CD4+ effector memory) | 61.4 $\pm$ 14.5 | 59 $\pm$ 13.4   | 55.7 $\pm$ 14.8 | 54.6 $\pm$ 16.3 |
| CD4+ effector memory 2<br>(% of CD4+ effector memory) | 0.9 $\pm$ 2     | 2.1 $\pm$ 2.4   | 0.5 $\pm$ 0.6   | 0.5 $\pm$ 0.5   |
| CD4+ effector memory 3<br>(% of CD4+ effector memory) | 9.1 $\pm$ 9.5   | 11.7 $\pm$ 16.8 | 10.7 $\pm$ 12.9 | 14.4 $\pm$ 10.7 |
| CD4+ effector memory 4<br>(% of CD4+ effector memory) | 28.7 $\pm$ 9    | 27.2 $\pm$ 6.3  | 33.1 $\pm$ 6.3  | 30.5 $\pm$ 14.2 |
| CCR7+ CD45RA+<br>(% of CD4+)                          | 39.3 $\pm$ 11.3 | 34.2 $\pm$ 10.6 | 31.9 $\pm$ 6.6  | 39.3 $\pm$ 16.7 |
| CCR7+ CD45RA+ CD31-<br>(% of CD4+ naive)              | 35.7 $\pm$ 12.6 | 34.9 $\pm$ 10.3 | 48.1 $\pm$ 17.1 | 57.3 $\pm$ 14.5 |
| CCR7+ CD45RA+ CD31+<br>(% of CD4+ CCR7+ CD45RA+)      | 62.9 $\pm$ 13.1 | 63 $\pm$ 11.4   | 46.6 $\pm$ 14.6 | 42.4 $\pm$ 14.5 |
| CD4+ TEMRA<br>(% of CD4+)                             | 1.7 $\pm$ 2.4   | 2 $\pm$ 3.5     | 2.7 $\pm$ 3.1   | 1.7 $\pm$ 1.8   |
| CD8+<br>(% of CD3+)                                   | 31.6 $\pm$ 10.3 | 28.9 $\pm$ 7.2  | 28.9 $\pm$ 6.6  | 27.8 $\pm$ 9.3  |
| CD8+ HLADR<br>(% of CD8+)                             | 14 $\pm$ 9.8    | 19.5 $\pm$ 12.1 | 14.3 $\pm$ 5.9  | 45.1 $\pm$ 17.5 |
| CD8+ central memory<br>(% of CD8+)                    | 7.7 $\pm$ 4.7   | 10.8 $\pm$ 5.2  | 11.8 $\pm$ 6.2  | 7.5 $\pm$ 5.1   |
| CD8+ effector memory<br>(% of CD8+)                   | 14.7 $\pm$ 7.1  | 19.6 $\pm$ 8.7  | 13.7 $\pm$ 6.2  | 17.5 $\pm$ 10.1 |
| CD8+ effector memory 1<br>(% of CD8+ effector memory) | 67 $\pm$ 13.7   | 62.8 $\pm$ 14.8 | 66.2 $\pm$ 11.4 | 56.7 $\pm$ 21.6 |
| CD8+ effector memory 2<br>(% of CD8+ effector memory) | 13.2 $\pm$ 8.8  | 15.8 $\pm$ 10.1 | 11.2 $\pm$ 9.9  | 34.6 $\pm$ 23.5 |
| CD8+ effector memory 3<br>(% of CD8+ effector memory) | 10.1 $\pm$ 9.4  | 12.2 $\pm$ 14.1 | 9.2 $\pm$ 7.3   | 5.9 $\pm$ 5.8   |
| CD8+ effector memory 4<br>(% of CD8+ effector memory) | 9.7 $\pm$ 5.8   | 9.2 $\pm$ 5.1   | 13.4 $\pm$ 5.8  | 2.7 $\pm$ 2.6   |
| CCR7+ CD45RA+<br>(% of CD8+)                          | 35.8 $\pm$ 15.5 | 35.3 $\pm$ 14.7 | 29.9 $\pm$ 8.4  | 16.8 $\pm$ 8.5  |
| CCR7+ CD45RA+ CD31-<br>(% of CD8+ CCR7+ CD45RA+)      | 5.3 $\pm$ 3.2   | 5.8 $\pm$ 4.4   | 6.6 $\pm$ 2.8   | 12.4 $\pm$ 9.1  |
| CCR7+ CD45RA+ CD31+<br>(% of CD8+ CCR7+ CD45RA+)      | 90.4 $\pm$ 5.6  | 89.2 $\pm$ 6.3  | 79.2 $\pm$ 10.5 | 85.3 $\pm$ 9    |
| CD8+ TEMRA<br>(% of CD8+)                             | 37.5 $\pm$ 20.2 | 29.7 $\pm$ 12.3 | 40 $\pm$ 14.3   | 55.2 $\pm$ 22.7 |

**Supplementary Table 8: T cells total mean values**

| <b>Patients group</b>                                 | <b>Contacts</b> | <b>Asymptomatic</b> | <b>Mild</b>     | <b>Severe</b>   |
|-------------------------------------------------------|-----------------|---------------------|-----------------|-----------------|
|                                                       | mean $\pm$ SD   | mean $\pm$ SD       | mean $\pm$ SD   | mean $\pm$ SD   |
| CD3+<br>(% of lymphocytes)                            | 70.4 $\pm$ 8    | 64.8 $\pm$ 8.6      | 72.4 $\pm$ 6.5  | 61.7 $\pm$ 15.4 |
| CD4+<br>(% of CD3+)                                   | 57.8 $\pm$ 12.1 | 62.1 $\pm$ 6.8      | 63.8 $\pm$ 7.6  | 64.7 $\pm$ 9.6  |
| CD4+ HLADR<br>(% of CD4+)                             | 5.4 $\pm$ 2.5   | 6.6 $\pm$ 3.1       | 6.6 $\pm$ 1.6   | 8.8 $\pm$ 3.5   |
| CD4+ central memory<br>(% of CD4+)                    | 41.8 $\pm$ 8.4  | 49 $\pm$ 8.6        | 45.9 $\pm$ 7.4  | 42.7 $\pm$ 10.4 |
| CD4+ effector memory<br>(% of CD4+)                   | 12.7 $\pm$ 6    | 13.7 $\pm$ 5.8      | 13.8 $\pm$ 6.8  | 12.7 $\pm$ 6.4  |
| CD4+ effector memory 1<br>(% of CD4+ effector memory) | 58.9 $\pm$ 15.5 | 59.9 $\pm$ 12.7     | 55.1 $\pm$ 17.2 | 55.6 $\pm$ 18.6 |
| CD4+ effector memory 2<br>(% of CD4+ effector memory) | 0.8 $\pm$ 1.9   | 1.2 $\pm$ 1.9       | 1.3 $\pm$ 2.2   | 0.7 $\pm$ 0.7   |
| CD4+ effector memory 3<br>(% of CD4+ effector memory) | 10.9 $\pm$ 11.5 | 11.2 $\pm$ 14.2     | 12.1 $\pm$ 14.9 | 12.5 $\pm$ 10.2 |
| CD4+ effector memory 4<br>(% of CD4+ effector memory) | 29.4 $\pm$ 8.9  | 27.8 $\pm$ 5.7      | 31.6 $\pm$ 6.2  | 31.3 $\pm$ 15.8 |
| CCR7+ CD45RA+<br>(% of CD4+)                          | 40.3 $\pm$ 11.4 | 32.1 $\pm$ 10.9     | 33.7 $\pm$ 7.7  | 39.8 $\pm$ 15.2 |
| CCR7+ CD45RA+ CD31-<br>(% of CD4+ naive)              | 36.3 $\pm$ 12   | 33.3 $\pm$ 9.9      | 46.3 $\pm$ 17   | 56.9 $\pm$ 12.6 |
| CCR7+ CD45RA+ CD31+<br>(% of CD4+ CCR7+ CD45RA+)      | 61.9 $\pm$ 13   | 64.7 $\pm$ 10.9     | 51.1 $\pm$ 17   | 42.6 $\pm$ 12.8 |
| CD4+ TEMRA<br>(% of CD4+)                             | 2.2 $\pm$ 3.1   | 2.3 $\pm$ 3.3       | 3.5 $\pm$ 5.2   | 1.9 $\pm$ 1.7   |
| CD8+<br>(% of CD3+)                                   | 33.3 $\pm$ 10.5 | 29.3 $\pm$ 5.6      | 29.3 $\pm$ 6.1  | 28.6 $\pm$ 7.4  |
| CD8+ HLADR<br>(% of CD8+)                             | 14.1 $\pm$ 10.2 | 17.9 $\pm$ 9.5      | 12.9 $\pm$ 5    | 39.3 $\pm$ 19.2 |
| CD8+ central memory<br>(% of CD8+)                    | 7.4 $\pm$ 4.5   | 12.2 $\pm$ 5.6      | 10.2 $\pm$ 5.2  | 7.4 $\pm$ 4.5   |
| CD8+ effector memory<br>(% of CD8+)                   | 13.9 $\pm$ 7.1  | 19.5 $\pm$ 8.4      | 14.3 $\pm$ 6.2  | 16.2 $\pm$ 8.7  |
| CD8+ effector memory 1<br>(% of CD8+ effector memory) | 64.8 $\pm$ 13.9 | 68.2 $\pm$ 13.4     | 67.3 $\pm$ 10.4 | 60 $\pm$ 24.1   |
| CD8+ effector memory 2<br>(% of CD8+ effector memory) | 14.2 $\pm$ 10.1 | 13.3 $\pm$ 9.5      | 9.2 $\pm$ 8.2   | 24.1 $\pm$ 23   |
| CD8+ effector memory 3<br>(% of CD8+ effector memory) | 10.8 $\pm$ 9.3  | 8.7 $\pm$ 10.5      | 9.4 $\pm$ 8.9   | 11.4 $\pm$ 17.6 |
| CD8+ effector memory 4<br>(% of CD8+ effector memory) | 10.2 $\pm$ 7    | 9.8 $\pm$ 4.6       | 14.2 $\pm$ 7.9  | 4.6 $\pm$ 3.3   |
| CCR7+ CD45RA+<br>(% of CD8+)                          | 34.5 $\pm$ 14.9 | 32.2 $\pm$ 13.5     | 31.2 $\pm$ 8.6  | 19.5 $\pm$ 8.8  |
| CCR7+ CD45RA+ CD31-<br>(% of CD8+ CCR7+ CD45RA+)      | 4.9 $\pm$ 3.1   | 5.9 $\pm$ 4.3       | 5.9 $\pm$ 3.3   | 11.6 $\pm$ 8.4  |
| CCR7+ CD45RA+ CD31+<br>(% of CD8+ CCR7+ CD45RA+)      | 89.1 $\pm$ 10.2 | 88.4 $\pm$ 6.7      | 86.4 $\pm$ 8.9  | 82.5 $\pm$ 11.1 |
| CD8+ TEMRA<br>(% of CD8+)                             | 39.9 $\pm$ 20.1 | 31.2 $\pm$ 10.4     | 39.9 $\pm$ 15.1 | 52.6 $\pm$ 19.1 |

**Supplementary Table 9: B cells mean values**

| <b>Patients group</b>                             | <b>Contacts</b> | <b>Asymptomatic</b> | <b>Mild</b>     | <b>Severe</b>   |
|---------------------------------------------------|-----------------|---------------------|-----------------|-----------------|
|                                                   | mean $\pm$ SD   | mean $\pm$ SD       | mean $\pm$ SD   | mean $\pm$ SD   |
| B cells<br>(% of lymphocytes)                     | 7.2 $\pm$ 2.3   | 8.4 $\pm$ 3.7       | 9.1 $\pm$ 4.4   | 5.6 $\pm$ 6.3   |
| B transitional<br>(% of B cells)                  | 4.6 $\pm$ 2.6   | 5.7 $\pm$ 3.2       | 4.8 $\pm$ 2.7   | 3.2 $\pm$ 2.5   |
| Naive B cells<br>(% of B cells)                   | 52.3 $\pm$ 16.8 | 55 $\pm$ 17.2       | 54.1 $\pm$ 12.3 | 52.4 $\pm$ 25.1 |
| Memory B cells<br>(% of B cells)                  | 40.7 $\pm$ 15.4 | 38.7 $\pm$ 16.4     | 39.8 $\pm$ 10.2 | 32.4 $\pm$ 19.6 |
| Atypical memory B cells<br>(% of B cells)         | 3.1 $\pm$ 2.1   | 2.7 $\pm$ 2         | 3.2 $\pm$ 4.4   | 4.5 $\pm$ 4.2   |
| Plasmablasts<br>(% of B cells)                    | 2.1 $\pm$ 3     | 1.9 $\pm$ 1.3       | 1.8 $\pm$ 1.5   | 8 $\pm$ 7.9     |
| IgM memory B cells<br>(% of memory B cells)       | 49.8 $\pm$ 14.8 | 54.1 $\pm$ 17.3     | 61.1 $\pm$ 14   | 37.7 $\pm$ 19   |
| Switched memory B cells<br>(% of memory B cells)  | 48.7 $\pm$ 15.2 | 43.5 $\pm$ 17.7     | 37.3 $\pm$ 14.3 | 60 $\pm$ 18.9   |
| IgG memory B cells<br>(% of memory B cells)       | 22.7 $\pm$ 8.9  | 16.7 $\pm$ 10.1     | 12.9 $\pm$ 6    | 19.9 $\pm$ 6.8  |
| IgG- IgM- memory B cells<br>(% of memory B cells) | 21.8 $\pm$ 8.2  | 21.9 $\pm$ 14       | 20 $\pm$ 6.3    | 32.3 $\pm$ 10.2 |
| Ratio IgG/IgG- IgM-                               | 1.1 $\pm$ 0.4   | 0.9 $\pm$ 0.5       | 0.6 $\pm$ 0.2   | 0.6 $\pm$ 0.2   |

**Supplementary Table 10: B cells total mean values**

| <b>Patients group</b>                             | <b>Contacts</b> | <b>Asymptomatic</b> | <b>Mild</b>     | <b>Severe</b>   |
|---------------------------------------------------|-----------------|---------------------|-----------------|-----------------|
|                                                   | mean $\pm$ SD   | mean $\pm$ SD       | mean $\pm$ SD   | mean $\pm$ SD   |
| B cells<br>(% of lymphocytes)                     | 7.2 $\pm$ 2.3   | 8.4 $\pm$ 2.7       | 9.3 $\pm$ 4.4   | 6.6 $\pm$ 6     |
| B transitional<br>(% of B cells)                  | 4.6 $\pm$ 2.6   | 6.8 $\pm$ 3.5       | 5 $\pm$ 2.3     | 3.3 $\pm$ 2.1   |
| Naive B cells<br>(% of B cells)                   | 52.8 $\pm$ 15.6 | 56.7 $\pm$ 18       | 54.3 $\pm$ 10.4 | 52.4 $\pm$ 21.8 |
| Memory B cells<br>(% of B cells)                  | 40.4 $\pm$ 14.3 | 36.9 $\pm$ 17.3     | 39.6 $\pm$ 8    | 33.7 $\pm$ 17.5 |
| Atypical memory B cells<br>(% of B cells)         | 3.1 $\pm$ 2     | 2.1 $\pm$ 1.6       | 2.7 $\pm$ 3.3   | 3.9 $\pm$ 3.6   |
| Plasmablasts<br>(% of B cells)                    | 2.1 $\pm$ 2.8   | 1.7 $\pm$ 1.2       | 1.8 $\pm$ 1.4   | 7.5 $\pm$ 6.1   |
| IgM memory B cells<br>(% of memory B cells)       | 50.5 $\pm$ 13.9 | 56.5 $\pm$ 16.1     | 60.9 $\pm$ 13.2 | 43 $\pm$ 20     |
| Switched memory B cells<br>(% of memory B cells)  | 47.9 $\pm$ 14.3 | 41.2 $\pm$ 16.3     | 37.2 $\pm$ 13.7 | 55.1 $\pm$ 19.7 |
| IgG memory B cells<br>(% of memory B cells)       | 22.3 $\pm$ 8.3  | 17.9 $\pm$ 9.1      | 13.7 $\pm$ 7.1  | 19.5 $\pm$ 7.8  |
| IgG- IgM- memory B cells<br>(% of memory B cells) | 21.7 $\pm$ 8    | 18.7 $\pm$ 11.6     | 19.3 $\pm$ 6.6  | 29.7 $\pm$ 10.2 |
| Ratio IgG/IgG- IgM-                               | 1.1 $\pm$ 0.4   | 1.1 $\pm$ 0.6       | 0.7 $\pm$ 0.3   | 0.7 $\pm$ 0.2   |
